1 **Comparison of the *in vitro*-efficacy of different mouthwash solutions**  
2 **targeting SARS-CoV-2 based on the European Standard EN 14476**

3

4 Katrin Steinhauer<sup>1,2\*</sup>, Toni Luise Meister<sup>3</sup>, Daniel Todt<sup>3,4</sup>, Adalbert Krawczyk<sup>5,6</sup>,  
5 Lars Paßvogel<sup>1</sup>, Britta Becker<sup>7</sup>, Dajana Paulmann<sup>7</sup>, Birte Bischoff<sup>7</sup>, Stephanie  
6 Pfaender<sup>3</sup>, Florian H H Brill<sup>7</sup> and Eike Steinmann<sup>3</sup>

7

8 <sup>1</sup>Department Research & Scientific Services, Schülke & Mayr GmbH, Norderstedt,  
9 Germany

10 <sup>2</sup>Faculty of Mechanical Engineering, Kiel University of Applied Sciences, Kiel,  
11 Germany

12 <sup>3</sup>Department of Molecular and Medical Virology, Ruhr University Bochum, 44801  
13 Bochum, Germany

14 <sup>4</sup>European Virus Bioinformatics Center (EVBC), 07743 Jena, Germany

15 <sup>5</sup>Department of Infectious Diseases, West German Centre of Infectious Diseases,  
16 University Hospital Essen, University of Duisburg-Essen, Essen, Germany

17 <sup>6</sup>Institute for Virology, University Hospital Essen, University of Duisburg-Essen,  
18 Essen, Germany

19 <sup>7</sup>Dr. Brill + Partner GmbH Institut for Hygiene and Microbiology, Hamburg, Germany

20

21 **Running title:** *in vitro*-efficacy of mouthwash solutions targeting SARS-CoV-2 based  
22 on EN 14476

23    **\*For correspondence:**

24    Katrin Steinhauer

25    Schülke & Mayr GmbH

26    Research and Development

27    22840 Norderstedt

28    Germany

29    Tel: +49 40 52100557

30    Fax: +49 40 52100577

31    e-mail: [katrin.steinhauer@schuelke-mayr.com](mailto:katrin.steinhauer@schuelke-mayr.com)

32

## 33    **Abstract**

34    The SARS-Cov-2 pandemic is triggering a global health emergency alert, and recent  
 35    research is indicating the relevance of aerosols in the spread of SARS-CoV-2. Thus,  
 36    in this study antiseptic mouthwashes based on the actives chlorhexidine (CHX) and  
 37    octenidine (OCT) were investigated regarding their efficacy against SARS-CoV-2  
 38    using EN 14476. Based on the requirement of EN 14476 (i.e. reduction of viral titer  
 39    by  $\geq 4 \log_{10}$ ), the OCT-based formulation was effective within only 15 sec against  
 40    SARS-CoV-2, and thus constitutes an interesting candidate for future clinical studies  
 41    to prove its effectiveness in a potential prevention of SARS-CoV-2 transmission by  
 42    aerosols.

## 43 Introduction

44 Coronaviruses are enveloped single-stranded RNA viruses and are characterized by  
 45 club shaped spikes on the surface of the virion, prompting the name coronavirus due  
 46 to the similarity in appearance to a solar corona [1]. Until the SARS-CoV outbreak in  
 47 2002, coronaviruses were thought to only cause mild self-limiting infections in  
 48 humans but were known to cause a wide variety of infections in animals [1]. 17 years  
 49 later, in December 2019, a novel coronavirus was identified as the causative agent  
 50 of severe pneumonia in a cluster of patients [2], designated as SARS-CoV-2 due to  
 51 its relatedness to severe acute respiratory syndrome coronavirus (SARS-CoV) [3].  
 52 Since then SARS-CoV-2 spread around the world thereby triggering a global health  
 53 emergency alert. Thus, until vaccination becomes available a bundle of effective  
 54 preventive measures is desperately needed.

55 In this context, recent publications suggest the use of antimicrobial mouthwashes as  
 56 a preventive measure. This is based on the efficacy of antimicrobial mouthwashes to  
 57 reduce the number of microorganisms in the oral cavity prompting a reduction of  
 58 microorganisms in aerosols [4]. This is particularly interesting, as recent research  
 59 indicates the relevance of aerosols also in the spread of SARS CoV-2 [5].

60 Thus, in their review summarizing data for mouthwashes with chlorhexidine  
 61 gluconate (CHX), cetylpyridinium chloride (CPC), povidone-iodine (PVP-I), and  
 62 hydrogen peroxide ( $H_2O_2$ ) Vergara-Beunavventura and Castro-Ruiz indicate an  
 63 essential role of antiseptic mouthwashes to reduce SARS-CoV-2 viral load in dental  
 64 practice and undermine that research on this topic is urgently needed to verify the  
 65 potential of antiseptic mouth rinses as a further preventive measure [6]. The aim of  
 66 our study was therefore, to directly compare commercially available antiseptic  
 67 mouthwash formulations based on the common antiseptic actives chlorhexidine

(CHX) and octenidine dihydrochloride (OCT) regarding their efficacy against the pandemic coronavirus SARS-CoV-2. *In vitro*-experiments were carried out in accordance to the well-established European Standard EN 14476 [7] determined for evaluating the virucidal efficacy of chemical disinfectants and antiseptics, in which reduction of at least four decimal logarithms ( $\log_{10}$ ) of viral titer is requested to state efficacy.

74

## 75 **Material and Methods**

### 76 *Quantitative Suspension tests according to EN 14476*

77 Quantitative suspensions tests were carried out as described in EN 14476 [7].  
78 Briefly, efficacy against SARS CoV-2 [8] was studied using commercially available  
79 mouthwashes. A commercially available ready-to-use formulation designated  
80 formulation A (100 g contains: 0.1 g Chlorhexidine bis-(D-gluconate);  
81 GlaxoSmithKline Consumer Health GmbH & Co. KG, Germany) was used as one  
82 test formulation. In addition, a commercially available ready-to-use formulation  
83 designated formulation B (100 g contains: 0.2 g Chlorhexidine bis-(D-gluconate);  
84 GlaxoSmithKline Consumer Health GmbH & Co. KG, Germany) was used.  
85 Formulation C used in this study was also a ready-to-use preparation (trade name:  
86 octenisept, (drug authorisation number: 32834.00.00); 100 g contains: 0.1 g  
87 octenidine dihydrochloride, 2 g phenoxyethanol). Concentrations and contact times  
88 used throughout this study are indicated. Experiments were carried out under  
89 conditions of low organic soiling (0.3 g/L bovine serum albumin (BSA); “clean  
90 conditions”) as defined in EN 14476 [7].

91 Data presented are based on at least two independent experiments. Validation  
92 controls as defined in EN 14476 [7] were found to be effective in all experiments  
93 indicating validity of presented data.

94

## 95 **Results and Discussion**

96 Comparison of different commercially available mouthwashes based on the well-  
97 established antiseptically effective actives chlorhexidinedigluconate (CHX) and  
98 octenidinedihydrochloride (OCT) was conducted considering the European Standard  
99 EN 14476 [7]. The assays were carried out using an isolated SARS-CoV-2 outbreak  
100 strain [8] in the presence of low organic soiling (i.e. 0.3 g/L bovine serum albumin) as  
101 requested by EN 14476 [7] to also consider potential quenching of the actives by  
102 protein load as has been described before [9].

103 Data is presented in Figure 1. Figure 1 A shows SARS-CoV-2 reduction obtained for  
104 products A, B and C using end point titration. In these experiments the two  
105 formulations based on chlorhexidinedigluconate (formulations A and B) were found  
106 to have only limited efficacy against SARS-CoV-2. Thus, at a concentration of 80%  
107 (v/v) formulation A containing 0.1 % chlorhexidinedigluconate reduced the virus titer  
108 even at a prolonged contact time of 10 min by less than 1 log<sub>10</sub>. Formulation B  
109 containing 0.2 % chlorhexidinedigluconate reduced SARS-CoV-2 within a contact  
110 time of 1 min as well as at a prolonged contact time of 5 min when tested at 80%  
111 (v/v) concentration also by less than 1 log<sub>10</sub>. As for formulations A and B reduction of  
112 the virus titer was found not to be impacted by cytotoxic effects of the formulations,  
113 indicated by the lower limit of quantification (LLOQ), no additional large-volume  
114 plating (LVP) experiments were conducted. This is well in line with data from  
115 screening experiments in our lab, where virus reduction titers were found not to be

elevated due to less toxicity when using both formulations at a concentration of only 20% (v/v) (data not shown).

In contrast, when looking at the data for formulation C logarithmic reduction factors  $\log_{10}$  were found to be 1  $\log_{10}$  higher (i.e.  $\geq 3.02 \log_{10}$ ) for the 20% (v/v) concentration of product C when compared to the 80% (v/v) test concentration (i.e.  $\geq 2.02 \log_{10}$ ). This indicates, that the measuring window for product was diminished by cytotoxicity. Therefore, additional large volume plating (LVP) experiments to obtain a wider measuring window were conducted with formulation C. Data obtained using LVP are presented in figure 1 B, and indicate a reduction of SARS-CoV-2 titers by  $\geq 4.38 \log_{10}$  already within the shortest contact time of 15 sec for the octenidine dihydrochloride (OCT)-based mouthwash (formulation C). This was found for both test concentrations tested (80% (v/v) and 20% (v/v)).

Data presented in this study for the two CHX-based mouthwashes (formulations A and B) are well in line with data published by Meister et al. [10]. In their investigation of different mouthwashes targeting SARS-CoV-2 also only a limited efficacy (i.e.  $< 1 \log_{10}$ ) of the two tested commercially available mouthwashes based on chlorhexidinedigluconate was found. However, looking at the data for the octenidinedihydrochloride-based mouthwashes, in the earlier study by Meister et. al. [10] only limited virucidal activity of the formulation tested (i.e.  $< 1 \log_{10}$ ) was found, whereas in this study the tested octenidinedihydrochloride-based formulation (C) was found effective against SARS-CoV-2 within 15 sec (i.e.  $\geq 4 \log_{10}$ ). This differing data can be explained by the use of two different octenidine-based formulations in the two studies. In the earlier study [10] a formulation containing octenidinedihydrochloride as the only active was used as compared to the OCT-based formulation (formulation C) used in this study which contained

octenidinedihydrochloride in combination with phenoxyethanol. Furthermore this discrepancy indicates the value of pre-evaluating each individual formulation on the basis of EN 14476 when assessing the virucidal potential against SARS CoV-2. For this pre-evaluation the standard test surrogate virus modified vaccinia virus strain Ankara (MVA) to assess “virucidal activity against enveloped viruses” as defined in EN 14476 [7] has been found to be of value, as with this approach a non-pathogenic virus can be used in the lab to obtain reliable data regarding virucidal activity against enveloped viruses in general including SARS CoV-2.

In conclusion, in this study virucidal efficacy against SARS-CoV-2 could be demonstrated for formulation C meeting the  $> 4 \log_{10}$  requirement of EN 14476 [7] within a contact time of only 15 sec, making this formulation suitable to be used as a mouthwash.

Thus, based on this *in vitro*-data the OCT-based formulation used in this study constitutes an interesting candidate for future clinical studies to prove its effectiveness in a potential prevention of SARS-CoV-2 spread by aerosols.

## **Conflict of interest**

The authors KS and LP are employees of Schülke & Mayr GmbH, Norderstedt, Germany.

## **Funding source**

This study was funded by Schülke & Mayr GmbH, Norderstedt, Germany.



# Literature

1. Fehr, AR and Perlman, S: Coronaviruses: An overview of Their Replication and Pathogenesis. *Methods Mol Biol* 2015, 1282:1-23
2. Zhu N, Zhang D, Wang W, et al. A novel coronavirus from patients with pneumonia in China, 2019. *N Engl J Med*, 2020; 382:727-733
3. Chen Y, Liu Q, Guo D. Emerging coronaviruses: genome structure, replication, and pathogenesis. *J Med Virol*. 2020; 92:418-423.
4. Marui VC, Souto MLS, Rovai ES et al. Efficacy of preprocedural mouthrinses in the reduction of microorganisms in aerosol: a systematic review. *J Am Dent Ass* 2019; 150:1015-1026, e1
5. Fennelly KP. Particle sizes of infectious aerosols: implications for infection control. *Lancet Respir Med*. 2020 Sep;8(9):914-924. doi: 10.1016/S2213-2600(20)30323-4
6. Vergara-Buenvventura A and Castro-Ruiz C. Use of mouthwashes against COVID-19 in dentistry. *Br J Oral Maxillofac Surg* 2020; doi:10.106/j.bjoms.2020.08.016
7. European Committee for Standardization. European Standard EN 14476: Chemical disinfectants and antiseptics – Quantitative suspension test for the evaluation of virucidal activity in the medical area – Test method and requirements (Phase 2 / Step 1). Brussels 2019
8. Heilingloh CS, Aufderhorst UW, Schipper L, et al. Susceptibility of SARS-CoV-2 to UV irradiation. *American Journal of Infection Control*. 2020 Oct;48(10):1273-1275. DOI: 10.1016/j.ajic.2020.07.031.
9. Steinhauer, K, Eschenbacher, I, Radischat, N, Detsch, C, Niederweis, M, and Goroncy-Bermes, P. Rapid evaluation of the Mycobactericidal efficacy of

189           disinfectants in the quantitative carrier test EN 14563 by using fluorescent  
 190           *Mycobacterium terrae*. Appl Environm Microbiol 2010; 76:546-554  
 191       10. Meister TL, Brüggemann Y, Todt D et al. Virucidal efficacy of different oral  
 192       rinses against severe acute respiratory coronavirus 2. J Infect Dis. 2020;  
 193       [doi.org/10.1093/infdis/jiaa471](https://doi.org/10.1093/infdis/jiaa471)  
 194

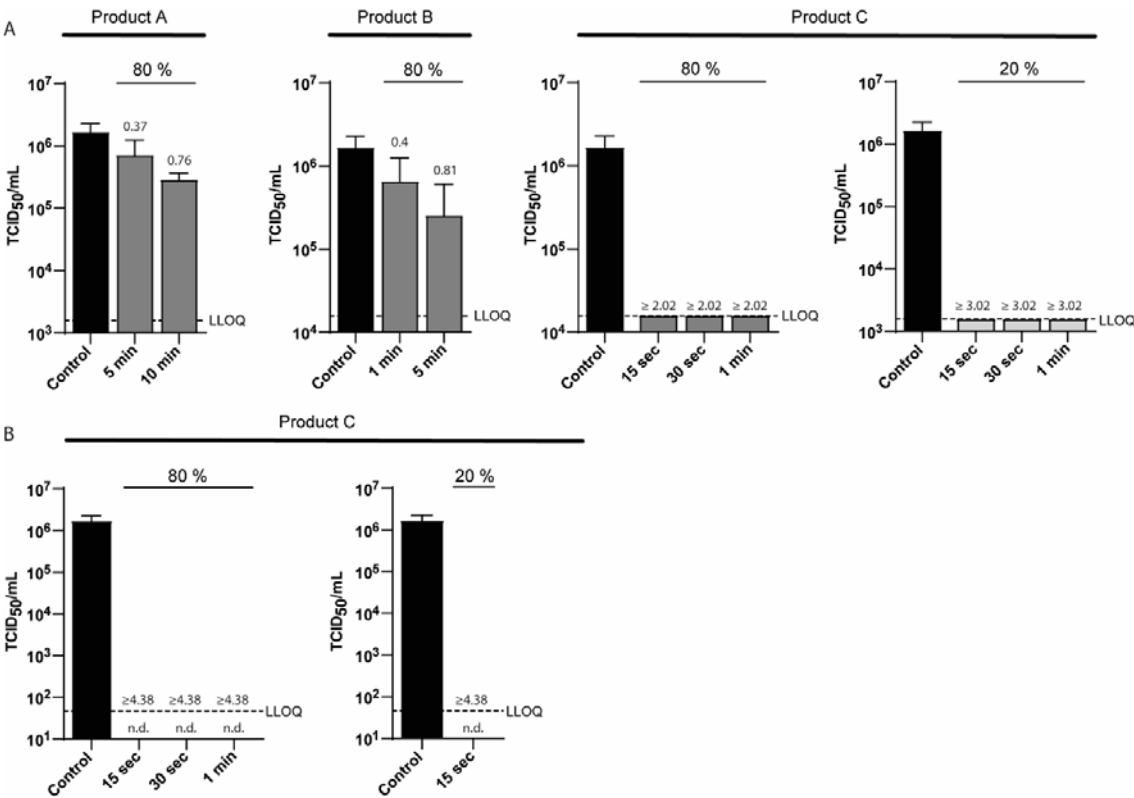

**Figure 1**

## Legend Figure 1

Figure 1: Virucidal activity of oral rinses against SARS-CoV-2. SARS-CoV-2 was incubated with medium (control, black bar) or various oral rinses (Product A-C) for indicated concentrations (80 % and/or 20 %) and time periods (15 sec to 10 min). The cytotoxic effect was monitored using non-infected cells incubated with the different products, defined as lower limit of quantification (LLOQ). Log-reduction factors are indicated above the bars. In panel A viral titers were determined upon limited endpoint titration on Vero E6 cells. Tissue culture infectious dose 50 (TCID<sub>50</sub>/mL) was calculated according to Spearman-Kärber. Due to high cytotoxic effects diminishing the measuring window for product C large volume plating was performed to reduce cytotoxicity and evaluate the remaining titers below 10<sup>4</sup> (panel B). No remaining cytopathic effects were observed (n.d.).
